# Supplementary material
Source: HighWire-hosted journal article supplement (http://www.cmaj.ca/highwire/filestream/70432/field_highwire_adjunct_files/4/170914-res-5-at.pdf)
Supplement: 170914-res-5-at.pdf [file 170914-res-5-at.pdf]

Appendix 5 (as supplied by the authors). CVDPoRT beta coefficients for male and female full and reduced models.

| Variable                 | Description                                                                                            | Male       |               | Female     |               |
|--------------------------|--------------------------------------------------------------------------------------------------------|------------|---------------|------------|---------------|
|                          |                                                                                                        | Full model | Reduced model | Full model | Reduced model |
| Age_rcs1                 | First RCS component for age                                                                            | 0.20442    | 0.20221       | 0.12403    | 0.12318       |
| Age_rcs2                 | Second RCS component for age                                                                           | -0.29214   | -0.27530      | -0.11222   | -0.10582      |
| Age_rcs3                 | Third RCS component for age                                                                            | 0.41124    | 0.34654       | 0.27784    | 0.25125       |
| Age_rcs4                 | Fourth RCS component for age                                                                           | 0.08734    | 0.16632       | -0.24028   | -0.20362      |
| Packyears_rcs1           | First RCS component for pack-years                                                                     | 0.01009    | 0.01039       | 0.02024    | 0.02093       |
| Packyears_rcs2           | Second RCS component for pack-years                                                                    | -0.03270   | -0.03343      | -15.38322  | -15.47109     |
| SmokeFormer5Plus_cat     | Former smoker quit > 5 years                                                                           | -0.00381   | -0.00705      | -0.09500   | -0.07290      |
| SmokeFormer0to5_cat      | Former smoker quit ≤ 5 years                                                                           | 0.24336    | 0.24284       | 0.13194    | 0.14887       |
| SmokeCurrent_cat         | Current smoker                                                                                         | 0.74404    | 0.75159       | 1.02654    | 1.05829       |
| AgeXPackyears_int        | Interaction between age and pack-years                                                                 | -0.00020   | -0.00020      | -0.00032   | -0.00033      |
| AgeXSmokeFormer5Plus_int | Interaction between age and former smoker quit > 5 years                                               | 0.00169    | 0.00163       | 0.00522    | 0.00489       |
| AgeXSmokeFormer0to5_int  | Interaction between age and former smoker quit ≤ 5 years                                               | -0.00629   | -0.00653      | 0.00135    | 0.00140       |
| AgeXSmokeCurrent_int     | Interaction between age and current smoker                                                             | -0.01497   | -0.01506      | -0.02210   | -0.02273      |
| DrinksLastWeek_rcs1      | First RCS component for the number of alcoholic drinks consumed within the previous week               | -0.03495   | -0.04456      | -0.01606   | -0.01595      |
| DrinksLastWeek_rcs2      | Second RCS component for the number of alcoholic drinks consumed within the previous week              | 0.07194    | 0.10171       |            |               |
| FormerDrinker_cat        | Former drinker: 0 drinks last year                                                                     | 0.07433    |               | 0.26336    | 0.27162       |
| AgeXDrinksLastWeek_int   | Interaction between age and number of drinks last week                                                 | 0.00036    | 0.00032       | -0.00002   | -0.00004      |
| AgeXFormerDrinker_int    | Interaction between age and former drinker                                                             | 0.00149    |               | -0.00617   | -0.00633      |
| FruitVeg_rcs1            | First RCS component for the average daily consumption of fruits, carrots, salad, and other vegetables  | -0.15873   | -0.16686      | -0.01212   | -0.02148      |
| FruitVeg_rcs2            | Second RCS component for the average daily consumption of fruits, carrots, salad, and other vegetables | 0.11846    | 0.12350       | 0.04429    | 0.05416       |
| Potato_rcs1              | First RCS component for the average daily consumption of potato                                        | 0.60457    | 0.58853       | 0.02122    |               |
| Potato_rcs2              | Second RCS component for the average daily consumption of potato                                       | -0.66414   | -0.61746      |            |               |
| Juice_cont               | Average daily consumption of juice                                                                     | 0.07955    | 0.07730       | -0.01719   |               |
| AgeXFruitVeg_int         | Interaction between age and total fruit and vegetable consumption                                      | 0.00150    | 0.00142       | -0.00100   | -0.00102      |
| AgeXPotato_int           | Interaction between age and potato                                                                     | -0.00587   | -0.00594      | -0.00299   |               |
| AgeXJuice_int            | Interaction between age and juice                                                                      | -0.00375   | -0.00368      | 0.00067    |               |
| PhysicalActivity_rcs1    | First RCS component for average energy expenditure                                                     | -0.02224   |               | -0.15603   | -0.16327      |
| PhysicalActivity_rcs2    | Second RCS component for average energy expenditure                                                    |            |               | 0.15094    | 0.15780       |

|                          |                                                                  |          |          |          |          |
|--------------------------|------------------------------------------------------------------|----------|----------|----------|----------|
| AgeXPhysicalActivity_int | Interaction between age and energy expenditure                   | -0.00022 |          | 0.00151  | 0.00148  |
| Stress_cat               | Self-perceived stress: a bit, quite a bit or extremely stressful | 0.01988  |          | 0.07136  |          |
| Belong_cont              | Sense of belonging                                               | -0.01489 |          |          |          |
| BelongSStrong_cat        | Sense of belonging: somewhat strong                              |          |          | -0.01808 |          |
| BelongSWeak_cat          | Sense of belonging: somewhat weak                                |          |          | 0.00889  |          |
| BelongVWeak_cat          | Sense of belonging: very weak                                    |          |          | 0.17272  |          |
| BMI_rcs1                 | First RCS component for the BMI                                  | 0.07646  | 0.07433  | 0.02070  | 0.02111  |
| BMI_rcs2                 | Second RCS component for the BMI                                 | -0.05377 | -0.05035 | -0.00431 | -0.00349 |
| AgeXBMI_int              | Interaction between age and BMI                                  | -0.00099 | -0.00099 | -0.00050 | -0.00053 |
| PercentTimeCanada_cont   | Percent time in Canada                                           | 0.00203  |          | 0.00243  |          |
| Immigrant_cat            | Immigrant                                                        | 0.02812  |          | 0.04085  |          |
| Ethnicity_cat            | Ethnicity: visible minority                                      | 0.13375  |          | -0.11888 |          |
| EduHSGrad_cat            | Secondary school graduate                                        | -0.03665 | -0.05172 | -0.06187 | -0.07138 |
| EduSomePS_cat            | Some post-secondary school education                             | 0.01716  | 0.00202  | -0.04951 | -0.05660 |
| EduPSGrad_cat            | Post-secondary school graduate                                   | -0.19448 | -0.21562 | -0.18223 | -0.19205 |
| Deprivation_cont         | Neighbourhood social and material deprivation                    | 0.04444  |          | 0.04564  |          |
| Diabetes_cat             | Has diabetes                                                     | 0.55942  | 0.57127  | 0.94917  | 0.95482  |
| AgeXDiabetes_int         | Interaction between age and diabetes                             | -0.01274 | -0.01271 | -0.02187 | -0.02206 |
| Hypertension_cat         | Has hypertension                                                 | 0.46496  | 0.46882  | 0.37296  | 0.37421  |
| AgeXHypertension_int     | Interaction between age and hypertension                         | -0.01634 | -0.01642 | -0.00489 | -0.00483 |
| SurveyCycle2_cat         | CCHS Cycle 2.1                                                   | -0.08376 | -0.07968 | -0.11291 | -0.11452 |
| SurveyCycle3_cat         | CCHS Cycle 3.1                                                   | -0.13265 | -0.12574 | -0.28991 | -0.29283 |
| SurveyCycle4_cat         | CCHS Cycle 4.1                                                   | -0.43661 | -0.42295 | -0.43880 | -0.44322 |

Abbreviations: BMI = body mass index; RCS = restricted cubic spline
